# Supplementary material for: Development of a comprehensive database of scattering environmental conditions and simulation constraints for offshore wind turbines
Source: Copernicus journal article supplement (doi:10.5194/wes-2-491-2017), 2017-10-26
Supplement: Supplementary file [file wes-2-491-2017-supplement-title-page.pdf › wes-2-491-2017-supplement-title-page.pdf]

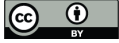

## *Supplement of*

# **Development of a comprehensive database of scattering environmental conditions and simulation constraints for offshore wind turbines**

**Clemens Hübler et al.**

*Correspondence to:* Clemens Hübler ([c.huebler@isd.uni-hannover.de](mailto:c.huebler@isd.uni-hannover.de))

- [wes-2-491-2017-supplement-title-page.pdf](#)
- [Supplementary\\_Material](#)
  - [Non\\_parametric\\_pds](#)
    - \* [FINO1](#)
    - \* [FINO2](#)
    - \* [FINO3](#)
  - [supplementary\\_material .pdf](#)

The copyright of individual parts of the supplement might differ from the CC BY 3.0 License.
